# Supplementary material
Source: publisher figshare collection journal article supplement (https://geolsoc.figshare.com/ndownloader/files/28010195)
Supplement: Supplementary file 1 [file 28010195]

## Sheet: Permian
Table S3. Zircon Hf isotopic results of Permian granitic rocks in Phan Si Pan-Tu Le region.
Sample - Spot		Inferred age (Ma ± 1σ)		176Hf/177Hf	± 1σ	176Lu/177Hf	± 1σ	176Yb/177Hf	± 1σ		εHf(0)	εHf(T)	± 1σ	TDM (Ma)	TDMC (Ma)
PSP2c (Muong Hum granite- O Quy Ho Pass)
PSP2c-01		247	6	0.282783	1.6e-05	0.000967379	6.2e-06	0.0283135	8.7e-05		0.389006	5.66076	0.566134	664.09	914.216
PSP2c-05		255	6	0.282751	2.2e-05	0.00134302	3.4e-05	0.0411881	0.00097		-0.742648	4.63629	0.778448	716.438	985.75
PSP2c-06		255	6	0.282736	2.7e-05	0.00253082	0.00026	0.079107	0.0083		-1.27311	3.90496	0.955368	762.086	1032.3
PSP2c-9		257	6	0.282815	3e-05	0.00121088	7.6e-05	0.0353096	0.0024		1.52066	6.96568	1.06152	622.876	838.481
PSP2c-10 (Core?)		253	7	0.282845	2.1e-05	0.00306636	0.0001	0.0992984	0.0034		2.58159	7.63135	0.743061	610.443	792.735
PSP2c-10 (Rim)		258	6	0.282799	1.2e-05	0.00117641	2.6e-05	0.0403113	0.00064		0.954833	6.42667	0.424611	645.054	873.709
PSP2c-13		245	6	0.282778	2.8e-05	0.00139368	2.5e-05	0.0459916	0.0013		0.212185	5.37189	0.99073	678.839	931.104
PSP2c-16		246	6	0.282779	1.9e-05	0.00108913	2.1e-05	0.0359194	0.0008		0.247549	5.47799	0.672283	671.915	925.116
PSP2c-19		258	6	0.282767	1.4e-05	0.00110156	1.7e-05	0.034287	0.00078		-0.176821	5.30716	0.495379	689.152	945.238
PSP28d (Nam Xe - Tam Duong granite)
PSP28d-01 (Core)		257	6	0.282793	2e-05	0.00116962	0.00012	0.0391106	0.0042		0.742648	6.19425	0.707683	653.465	887.795
PSP28d-02		257	6	0.282802	2.4e-05	0.00200666	2.1e-05	0.069053	0.00034		1.06093	6.37025	0.84922	655.318	876.495
PSP28d-06		260	6	0.282816	2e-05	0.00220225	3.2e-05	0.0715357	0.00065		1.55602	6.89412	0.707688	638.371	845.309
PSP28d-11		260	6	0.282886	2.1e-05	0.0056205	0.0001	0.192289	0.004		4.03152	8.78247	0.743072	591.5	724.376
PSP28d-13		257	6	0.282852	1.7e-05	0.00511619	0.00011	0.170967	0.0037		2.82913	7.61026	0.601531	636.681	797.053
PSP28d-17		259	6	0.282853	1.9e-05	0.00376922	7.9e-05	0.125722	0.0012		2.8645	7.91399	0.672302	610.529	779.246
PSP28d-18		258	6	0.282709	2.7e-05	0.00109544	5.1e-05	0.0334955	0.0022		-2.22794	3.25592	0.955374	771.189	1076.13
PSP28d-19		267	6	0.282824	1.7e-05	0.00531343	0.00014	0.188911	0.0051		1.83894	6.77121	0.601544	685.224	858.351
Sample - Spot		Inferred age (Ma ± 1σ)		176Hf/177Hf	± 1σ	176Lu/177Hf	± 1σ	176Yb/177Hf	± 1σ		εHf(0)	εHf(T)	± 1σ	TDM (Ma)	TDMC (Ma)
PSP24 (Tu Le rhyolite)
PSP24-03		257	6	0.282789	2.5e-05	0.000982524	2.2e-05	0.0303911	0.00068		0.601191	6.08456	0.884604	655.874	894.817
PSP24-04		254	6	0.282772	1.2e-05	0.0010836	2.1e-05	0.034555	0.00053		0	5.40183	0.424607	681.737	936.123
PSP24-07		256	7	0.282714	2.4e-05	0.00090561	2.7e-05	0.0270503	0.0008		-2.05112	3.42239	0.849218	760.271	1064.01
PSP24-09		258	6	0.282725	2.2e-05	0.00143884	7.3e-05	0.0485461	0.0025		-1.66212	3.7634	0.778453	755.445	1043.74
PSP24-10 (Core)		257	6	0.282749	3e-05	0.00432344	3.9e-05	0.138701	0.0012		-0.813376	4.10061	1.06152	781.744	1021.17
PSP24-11		263	6	0.282764	2.2e-05	0.0015559	9e-06	0.053298	0.00039		-0.282913	5.22848	0.778462	701.9	954.066
PSP24-12		259	7	0.282756	1.9e-05	0.00072838	1.8e-05	0.0218541	0.00034		-0.565827	5.00326	0.672302	697.808	965.44
PSP24-13		254	7	0.282802	2.2e-05	0.00133231	1.7e-05	0.0404176	0.00042		1.06093	6.42152	0.778446	643.468	870.954
PSP24-14		257	6	0.28279	1.4e-05	0.00222278	2.4e-05	0.0701745	0.00099		0.636555	5.90886	0.495378	676.755	905.959
PSP24-15		251	6	0.282755	1.8e-05	0.000926431	9.3e-06	0.0300483	0.00061		-0.601191	4.76245	0.636906	702.883	974.664
PSP24-16 (Core)		250	7	0.282749	1.6e-05	0.000489985	2e-05	0.0179407	0.00094		-0.813376	4.60096	0.566138	703.211	984.243
PSP24-17		257	7	0.282772	2.7e-05	0.000889728	7.3e-06	0.0271018	0.00016		0	5.49882	0.955372	678.236	932.245
PSP24-18		257	6	0.282811	2.1e-05	0.00141127	2.5e-05	0.0471425	0.0011		1.3792	6.79004	0.743067	631.955	849.699
PSP24-19		254	6	0.28273	1.8e-05	0.00207187	2.4e-05	0.0658157	0.00052		-1.4853	3.74948	0.636911	761.248	1041.5
PSP24-20		256	6	0.282751	1.4e-05	0.00102928	2.2e-05	0.0347535	0.00065		-0.742648	4.71063	0.495377	710.463	981.798
PSP24-21		256	7	0.282758	3e-05	0.00230621	7.1e-05	0.0745879	0.0016		-0.495099	4.74185	1.06152	725.179	979.696
PSP24-22		250	6	0.282779	1.5e-05	0.000946012	5.3e-05	0.029957	0.0015		0.247549	5.58698	0.530754	669.363	921.235
Sample - Spot		Inferred age (Ma ± 1σ)		176Hf/177Hf	± 1σ	176Lu/177Hf	± 1σ	176Yb/177Hf	± 1σ		εHf(0)	εHf(T)	± 1σ	TDM (Ma)	TDMC (Ma)
PSP29a (Tu Le rhyolite)
PSP29a-01 (Core)		256	7	0.282749	1.5e-05	0.00038569	3.7e-06	0.0170438	0.00028		-0.813376	4.74897	0.530761	701.294	979.402
PSP29a-01 (Rim)		251	10	0.282787	2.3e-05	0.000678219	9.8e-06	0.0241604	0.00087		0.530463	5.93598	0.813825	653.42	899.721
PSP29a-02		254	6	0.282787	1.7e-05	0.00231247	4.4e-05	0.0797624	0.0015		0.530463	5.7259	0.601527	682.823	915.334
PSP29a-03		252	6	0.282799	1.3e-05	0.00113763	4.3e-06	0.0351477	0.00037		0.954833	6.30552	0.459989	644.387	876.843
PSP29a-04		248	7	0.282803	2.8e-05	0.00127359	4.6e-05	0.0400698	0.0011		1.09629	6.33955	0.990737	641.031	871.584
PSP29a-05		254	6	0.282764	2.3e-05	0.00184258	2.1e-05	0.0566628	0.00045		-0.265231	5.0088	0.81383	706.645	961.162
PSP29a-06		251	6	0.282757	2.4e-05	0.000660129	3.3e-06	0.02147	0.00029		-0.530463	4.87747	0.849209	695.154	967.341
PSP29a-09		249	6	0.282805	1.6e-05	0.000759393	9.5e-06	0.0225417	0.00023		1.16702	6.5163	0.566137	629.513	861.085
PSP29a-10		254	6	0.282753	1.9e-05	0.000781544	1.4e-05	0.0249327	0.00031		-0.671919	4.78034	0.672295	703.004	975.834
PSP29a-11		258	6	0.282793	2.1e-05	0.000984091	4.7e-05	0.0332369	0.0014		0.742648	6.24722	0.743069	650.245	885.19
PSP29a-13 (Core)		242	6	0.282771	2e-05	0.00135116	3.1e-05	0.041174	0.001		-0.0353642	5.06766	0.70766	688.057	948.237
PSP29a-13 (Rim)		247	7	0.282828	3e-05	0.00141821	2.4e-05	0.0410713	0.0007		1.98039	7.17928	1.0615	607.735	817.114
PSP29a-15		257	7	0.282723	2.3e-05	0.000982972	2.3e-05	0.0290417	0.00042		-1.73284	3.74912	0.813836	749.129	1043.93
PSP29a-16		257	7	0.282845	2.6e-05	0.000527615	2.6e-06	0.0153868	9.2e-05		2.58159	8.14349	0.919988	569.739	763.164
PSP29a-18		257	7	0.282824	2.6e-05	0.00101875	3.2e-05	0.0337061	0.00078		1.83894	7.31684	0.919988	606.944	816.034
λ Lu-Hf = 1.867 × 10-11 year-1 (Söderlund et al., 2004. Earth Planetary Science Letters, 219, 311-324.)
εHf(T) = [(176Hf/177Hf)SampleT /(176Hf/177Hf)CHURT - 1] × 104
εHf(T) = {[((176Hf/177Hf)Sample0 - (176Lu/177Hf)Sample0 × (eλT - 1))/((176Hf/177Hf)CHUR0 - (176Lu/177Hf)CHUR0 × (eλT - 1))] -1} × 104
TDM = 1/λ × ln {1 + [((176Hf/177Hf)Sample0 - (176Hf/177Hf)DM0)/((176Lu/177Hf)Sample0 - (176Lu/177Hf)DM0)]}
TDMC = TDM – (TDM – t) × [(fCC-fS)/(fCC-fDM)]
fLu/Hf = [(176Lu/177Hf)Source/(176Lu/177Hf)CHUR, 0 ] – 1
(176Lu/177Hf)CHUR, 0 = 0.0332 ± 2 (Blichert-Toft and Albarede, 1997. Earth Planetary Science Letters, 148, 243-258.)
(176Hf/177Hf)CHUR, 0 = 0.282772 ± 29 (Blichert-Toft and Albarede, 1997. Earth Planetary Science Letters, 148, 243-258.)
(176Lu/177Hf)DM = 0.0384 (Griffin et al., 2000. Geochimica Cosmochimica Acta, 64, 133-147.)
(176Hf/177Hf)DM = 0.28325 (Griffin et al., 2000. Geochimica Cosmochimica Acta, 64, 133-147.)
(176Lu/177Hf)mean crust = 0.015 (Griffin et al., 2002. Lithos, 61, 237-269.)
